# Supplementary material for: Nitrogen-doped carbon layer coated Co(OH)F/CoP2 nanosheets for high-current hydrogen evolution reaction in alkaline freshwater and seawater
Source: Royal Society of Chemistry journal article supplement (doi:10.1039/d4dt01713g), 2024-01-01
Supplement: d4dt01713g1.pdf [file d4dt01713g1.pdf]

## Supporting information

### **Nitrogen-doped carbon layer coated Co(OH)F/CoP<sub>2</sub> nanosheets for high-current hydrogen evolution reaction in alkaline freshwater and seawater**

Yuxuan Wang<sup>1</sup>, Chao Fan<sup>1</sup>, Kang Wang, and Yan-Qin Wang\*

Inner Mongolia Key Laboratory of Chemistry and Physics of Rare Earth Materials,  
College of Chemistry and Chemical Engineering, Inner Mongolia University, 24  
Zhaojun Road, Hohhot 010021, P. R. China

E-mail: [yqwang\\_chem@imu.edu.cn](mailto:yqwang_chem@imu.edu.cn)

<sup>1</sup>Yuxuan Wang and Chao Fan contributed equally.

## 1. Supporting Figures and Table

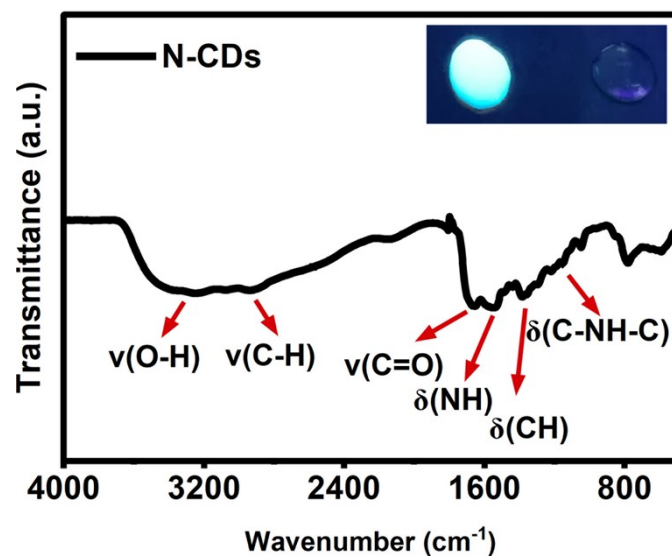

**Fig. S1** FTIR spectra of N-CDs, the inset is the picture of N-CDs solution and deionized water under UV light irradiation.

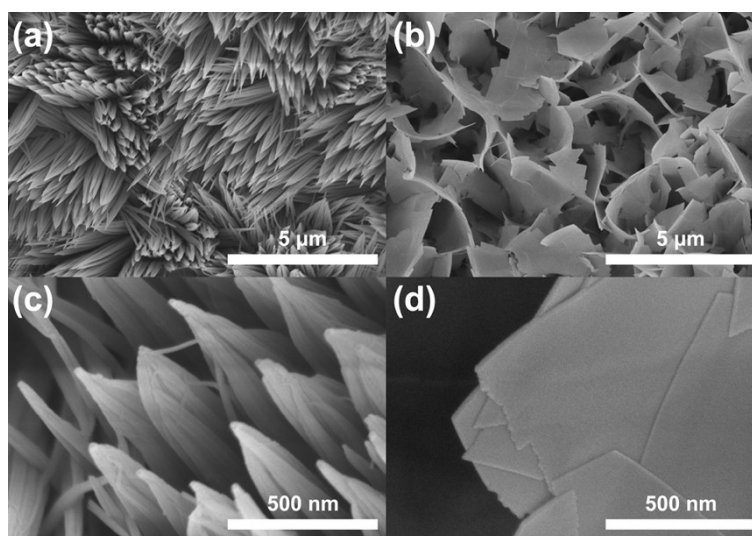

**Fig. S2** SEM images of catalysts at different magnifications. (a, c) Co(OH)F/Co(OH)(CO<sub>3</sub>)<sub>0.5</sub>/NF, and (b, d) NC@Co(OH)F/Co(OH)(CO<sub>3</sub>)<sub>0.5</sub>/NF.

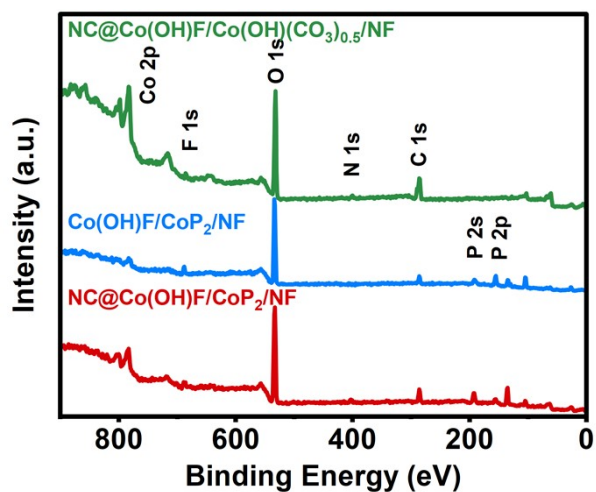

**Fig. S3** The survey XPS spectra of NC@Co(OH)F/Co(OH)(CO<sub>3</sub>)<sub>0.5</sub>/NF, Co(OH)F/CoP<sub>2</sub>/NF, and NC@Co(OH)F/CoP<sub>2</sub>/NF.

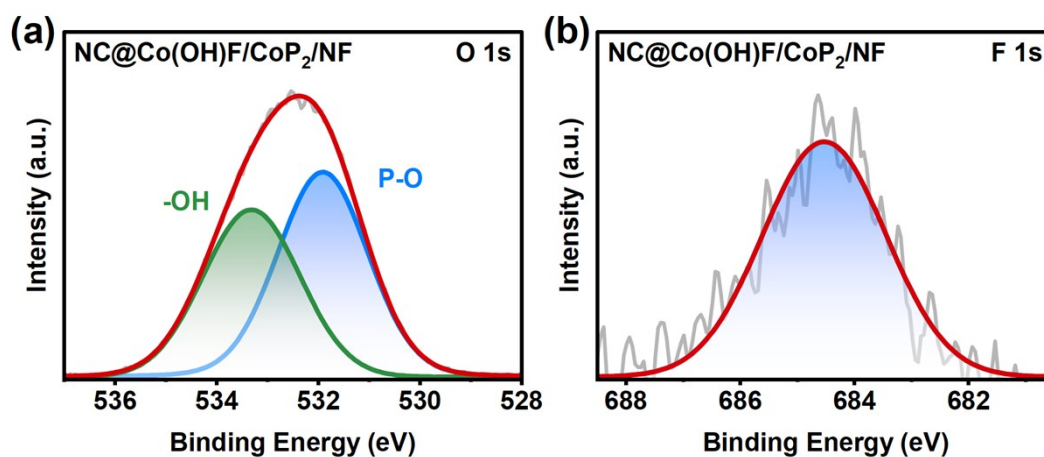

**Fig. S4** XPS spectra for (a) O 1s, and (b) F 1s of NC@Co(OH)F/CoP<sub>2</sub>/NF.

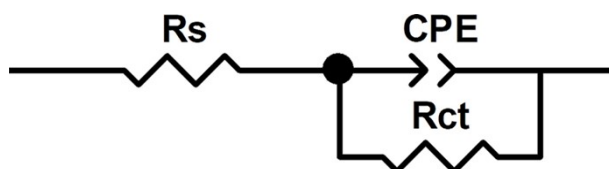

**Fig. S5** The one-time-constant model equivalent circuit used for data fitting of EIS spectra ( $R_s$  is the overall series resistance, CPE is the constant-phase element, and  $R_{ct}$  is the charge transfer resistance related to HER processes).

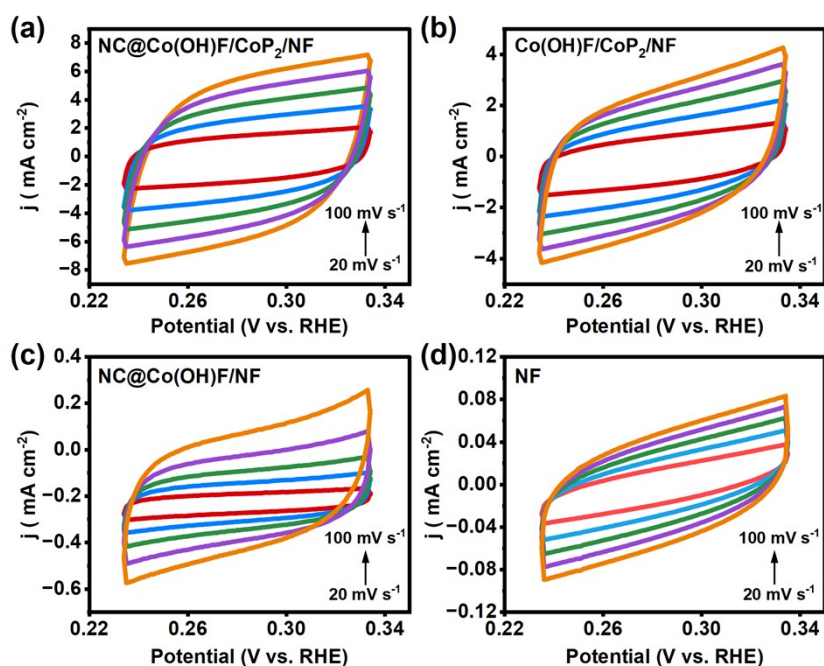

**Fig. S6** Cyclic voltammograms at various scan rates in the potential range of 0.22 ~ 0.33 V vs. RHE for NC@Co(OH)F/CoP<sub>2</sub>/NF (a), Co(OH)F/CoP<sub>2</sub>/NF (b), NC@Co(OH)F/NF (c) and NF (d), respectively.

The ECSA was determined assuming a general specific  $C_{dl}$  capacitance of  $40 \mu\text{F cm}^{-2}$ .

For all samples, the ECSA is estimated by the following formula:

$$A_{ECSA} = \frac{\text{Specific capacitance } (\mu\text{F cm}^{-2})}{40 \mu\text{F cm}^{-2} \text{ per cm}_{ECSA}^2}$$

$$A_{ECSA}^{NC@Co(OH)F/CoP_2/NF} = \frac{50.96 \text{ mF cm}^2}{40 \mu\text{F cm}^{-2} \text{ per cm}_{ECSA}^2} = 1274 \text{ cm}_{ECSA}^2$$

$$A_{ECSA}^{Co(OH)F/CoP_2/NF} = \frac{22.75 \text{ mF cm}^2}{40 \mu\text{F cm}^{-2} \text{ per cm}_{ECSA}^2} = 568.75 \text{ cm}_{ECSA}^2$$

$$A_{ECSA}^{NC@Co(OH)F/NF} = \frac{2.60 \text{ mF cm}^2}{40 \mu\text{F cm}^{-2} \text{ per cm}_{ECSA}^2} = 65 \text{ cm}_{ECSA}^2$$

$$A_{ECSA}^{NF} = \frac{0.45 \text{ mF cm}^2}{40 \mu\text{F cm}^{-2} \text{ per cm}_{ECSA}^2} = 11.25 \text{ cm}_{ECSA}^2$$

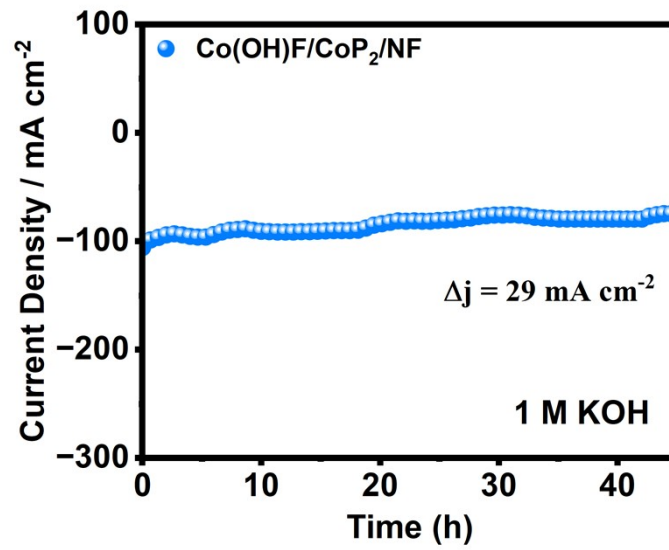

**Fig. S7** The i-t test of Co(OH)F/CoP<sub>2</sub>/NF at 100 mA cm<sup>-2</sup> in 1.0 M KOH.

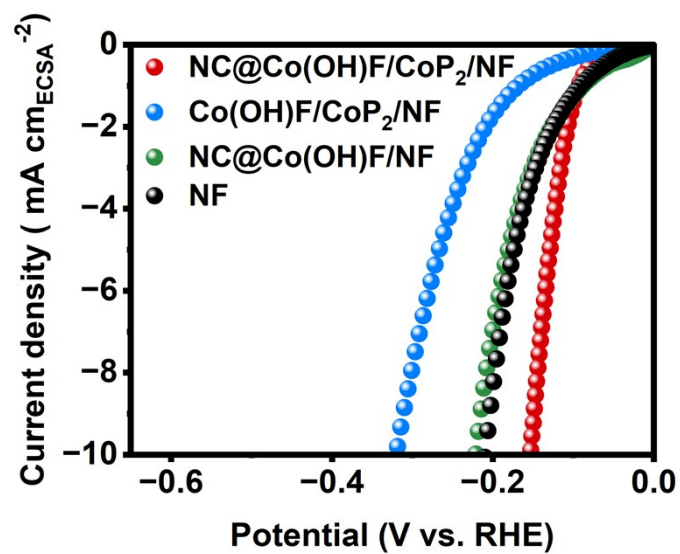

**Fig. S8** The ECSA-normalized LSV curves of different electrocatalysts in 1.0 M KOH.

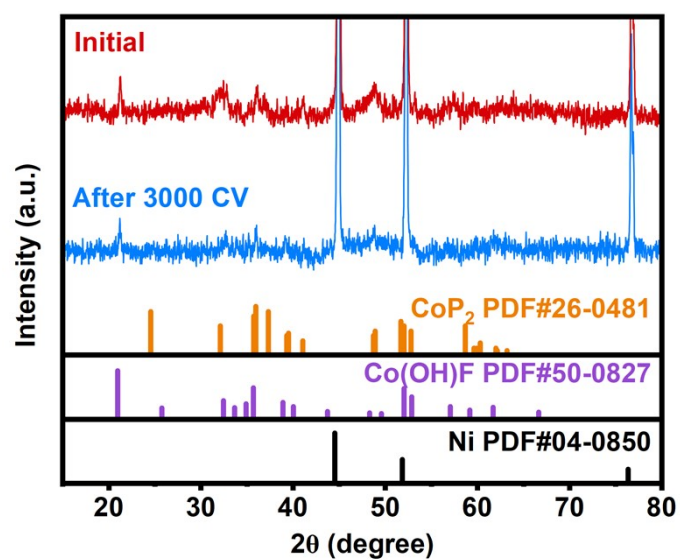

**Fig. S9** XRD patterns of NC@Co(OH)F/CoP<sub>2</sub>/NF before and after 3000 CV cycles, and the standard PDF cards for CoP<sub>2</sub>, Co(OH)F, and Ni.

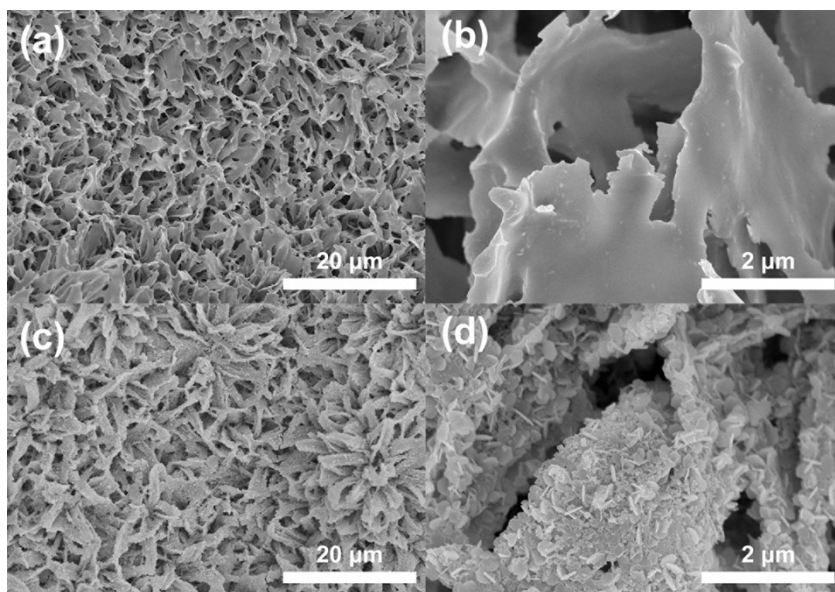

**Fig. S10** (a-b) SEM images of NC@Co(OH)F/CoP<sub>2</sub>/NF at different magnifications before 3000 HER CV cycles, and (c-d) SEM images of NC@Co(OH)F/CoP<sub>2</sub>/NF at different magnifications after 3000 HER CV cycles in 1.0 M KOH.

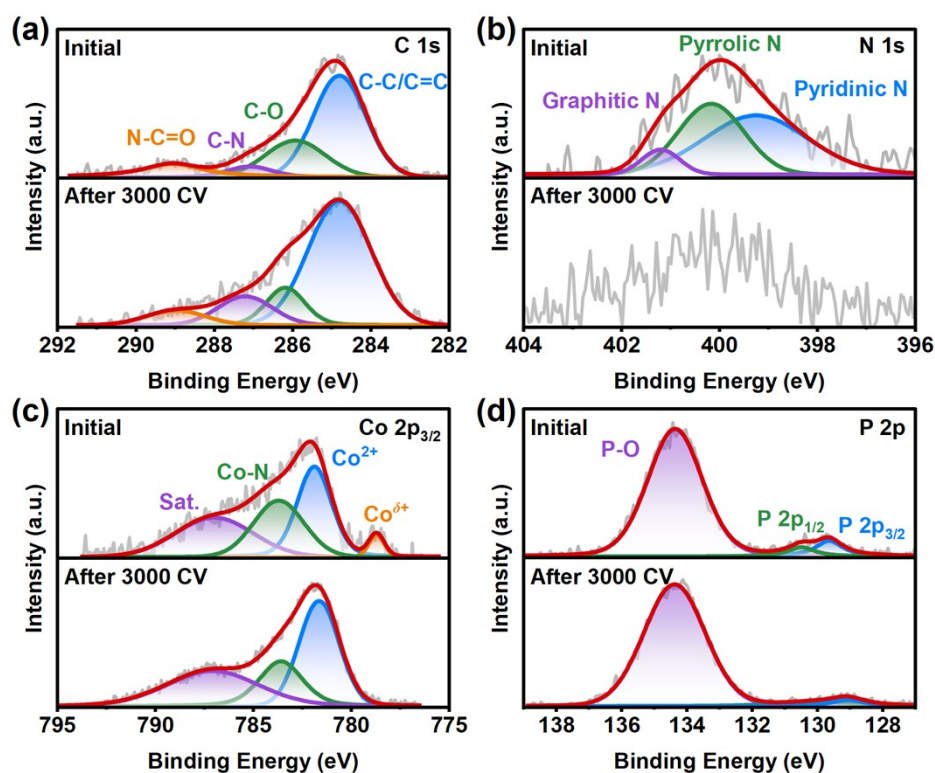

**Fig. S11** The comparison of the high-resolution XPS spectra of NC@Co(OH)F/CoP<sub>2</sub>/NF before and after HER tests for (a) C 1s, (b) N 1s, (c) Co 2p<sub>3/2</sub>, and (d) P 2p, respectively.





**Table S1.** Comparison of HER performance between NC@Co(OH)F/CoP<sub>2</sub>/NF and other nonprecious metal-based HER electrocatalysts in 1.0 M KOH. (*j*: current density; *η*: overpotential)

| Electrocatalyst                                       | <i>j</i> (mA cm <sup>-2</sup> ) | <i>η</i> (mV) | Ref.      |
|-------------------------------------------------------|---------------------------------|---------------|-----------|
| NC@Co(OH)F/CoP <sub>2</sub> /NF                       | 100/1000                        | 107/189       | This work |
| CQDs/Mn <sub>x</sub> Ni <sub>5-x</sub> P <sub>4</sub> | 100                             | 120           | 1         |
| Vp-CoP-FeP/NF                                         | 100                             | 144           | 2         |
| FeP@CoP/NF                                            | 100                             | 183           | 3         |
| Fe-CoP                                                | 100                             | 227           | 4         |
| NiP/NG                                                | 100                             | 300           | 5         |
| FePi-NiS/NF                                           | 1000                            | 223           | 6         |
| Te-WSe <sub>2</sub>                                   | 1000                            | 232           | 7         |
| F-Co <sub>2</sub> P/Fe <sub>2</sub> P/IF              | 1000                            | 260           | 8         |
| NiCo@C-NiCoMoO/NF                                     | 1000                            | 266           | 9         |
| Ni-Co-P/CFP                                           | 1000                            | 295           | 10        |
| NiCoP foam/NF                                         | 1000                            | 328           | 11        |
| a-MoWS <sub>x</sub> /N-RGO                            | 1000                            | 348           | 12        |
| W-NiCu <sub>array</sub> /CM                           | 1000                            | 349           | 13        |
| Mo-NiFeP/NIF                                          | 1000                            | 353           | 14        |
| CoP/Cu <sub>2</sub> O@CF                              | 1000                            | 358           | 15        |

**Table S2.** Comparison of HER performance between NC@Co(OH)F/CoP<sub>2</sub>/NF and other nonprecious metal-based HER electrocatalysts in natural seawater containing 1.0 M KOH. (*j*: current density; *η*: overpotential)

| Electrocatalyst                                        | <i>j</i> (mA cm <sup>-2</sup> ) | <i>η</i> (mV) | Ref.      |
|--------------------------------------------------------|---------------------------------|---------------|-----------|
| NC@Co(OH)F/CoP <sub>2</sub> /NF                        | 100/1000                        | 128/237       | This work |
| FeP@CoP/CC                                             | 100                             | 220           | 16        |
| CoMoO <sub>4</sub> /CoP/CC                             | 100                             | 218           | 17        |
| NiFeCr-S/Ni <sub>3</sub> S <sub>2</sub> /NF            | 100                             | 236           | 18        |
| Mn-MoW <sub>Ni</sub>                                   | 100                             | 261           | 19        |
| NiPS/NF                                                | 100                             | 188           | 20        |
| MnCo/NiSe                                              | 1000                            | 270           | 21        |
| NiCoHPi@Ni <sub>3</sub> N/NF                           | 100                             | 182           | 22        |
| NiCoP <sub>v</sub> /NF                                 | 1000                            | 257           | 23        |
| CoP <sub>x</sub>                                       | 100                             | 190           | 24        |
| NNNF@Mo <sub>2</sub> N/FeO <sub>x</sub> N <sub>y</sub> | 100                             | 142           | 25        |
| NiFe-P@NC                                              | 100                             | 149           | 26        |

**Table S3.** ICP test results of the electrolyte after CV cycling test.

| Element | Content (mg/L) |
|---------|----------------|
| Co      | 0.9            |
| P       | 216.6          |

## 2. Reference

1. W. Chen, Z. Qin, B. McElhenny, F. Zhang, S. Chen, J. Bao, Z. M. Wang, H.-Z. Song and Z. Ren, The effect of carbon quantum dots on the electrocatalytic hydrogen evolution reaction of manganese–nickel phosphide nanosheets, *J. Mater. Chem. A*, 2019, **7**, 21488-21495.
2. L. Qi, Z. Huang, M. Liao, L. Wang, L. Wang, M. Gao, T. Taylor Isimjan and X. Yang, Synergistic Promotion of Large-Current Water Splitting through Interfacial Engineering of Hierarchically Structured CoP-FeP Nanosheets with Rich P Vacancies, *Chem-Eur J*, 2023, **29**, e202301521.
3. C. Lyu, J. Cheng, K. Wu, J. Wu, N. Wang, Z. Guo, P. Hu, W.-M. Lau and J. Zheng, Interfacial electronic structure modulation of CoP nanowires with FeP nanosheets for enhanced hydrogen evolution under alkaline water/seawater electrolytes, *Appl. Catal., B*, 2022, **317**, 121799.
4. L.-M. Cao, Y.-W. Hu, S.-F. Tang, A. Iljin, J.-W. Wang, Z.-M. Zhang and T.-B. Lu, Fe-CoP Electrocatalyst Derived from a Bimetallic Prussian Blue Analogue for Large-Current-Density Oxygen Evolution and Overall Water Splitting, *Adv. Sci.*, 2018, **5**, 1800949.
5. J. Hu, L. Peng, A. Primo, J. Albero and H. García, High-current water electrolysis performance of metal phosphides grafted on porous 3D N-doped graphene prepared without using phosphine, *Cell Rep. Phys. Sci.*, 2022, **3**, 100873.
6. L. Guo, J. Xie, S. Chen, Z. He, Y. Liu, C. Shi, R. Gao, L. Pan, Z.-F. Huang, X. Zhang and J.-J. Zou, Self-supported crystalline-amorphous composites of metal phosphate and NiS for high-performance water electrolysis under industrial conditions, *Appl. Catal., B*, 2024, **340**, 123252.
7. X. Zhang, D. Zhang, X. Chen, D. Zhou, J. Zhang and Z. Wang, Te-doped-WSe<sub>2</sub>/W as a stable monolith catalyst for ampere-level current density hydrogen evolution reaction, *Phys. Chem. Chem. Phys.*, 2024, **26**, 3880-3889.
8. X.-Y. Zhang, Y.-R. Zhu, Y. Chen, S.-Y. Dou, X.-Y. Chen, B. Dong, B.-Y. Guo, D.-P. Liu, C.-G. Liu and Y.-M. Chai, Hydrogen evolution under large-current-density

- based on fluorine-doped cobalt-iron phosphides, *Chem. Eng. J.*, 2020, **399**, 125831.
9. G. Qian, J. Chen, T. Yu, L. Luo and S. Yin, N-Doped Graphene-Decorated NiCo Alloy Coupled with Mesoporous NiCoMoO Nano-sheet Heterojunction for Enhanced Water Electrolysis Activity at High Current Density, *Nano-Micro Lett.*, 2021, **13**, 77.
  10. X. Chen, X. Zhao, Y. Wang, S. Wang, Y. Shang, J. Xu, F. Guo and Y. Zhang, Layered Ni-Co-P Electrode Synthesized by CV Electrodeposition for Hydrogen Evolution at Large Currents, *ChemCatChem*, 2021, **13**, 3619-3627.
  11. L. He, Z. Cai, D. Zheng, L. Ouyang, X. He, J. Chen, Y. Li, X. Guo, Q. Liu, L. Li, W. Chu, S. Zhu, X. Sun and B. Tang, Three-dimensional porous NiCoP foam enabled high-performance overall seawater splitting at high current density, *J. Mater. Chem. A*, 2024, **12**, 2680-2684.
  12. D. Zhang, F. Wang, W. Zhao, M. Cui, X. Fan, R. Liang, Q. Ou and S. Zhang, Boosting Hydrogen Evolution Reaction Activity of Amorphous Molybdenum Sulfide Under High Currents Via Preferential Electron Filling Induced by Tungsten Doping, *Adv. Sci.*, 2022, **9**, 2202445.
  13. K. Wei, H. Hu, Y. Song, Y. Wang, Y. Meng, Y. Wang, J. Zhou and F. Gao, Morphological engineering coupled with electronic engineering accelerates H<sub>2</sub> production at the high current density, *Sep. Purif. Technol.*, 2023, **326**, 124814.
  14. Y. Wang, P. Yang, Y. Gong, D. Liu, S. Liu, W. Xiao, Z. Xiao, Z. Li, Z. Wu and L. Wang, Amorphous high-valence Mo-doped NiFeP nanospheres as efficient electrocatalysts for overall water-splitting under large-current density, *Chem. Eng. J.*, 2023, **468**, 143833.
  15. R. Qi, X. Liu, H. Bu, X. Niu, X. Ji, J. Ma and H. Gao, In situ growth of phosphorized ZIF-67-derived amorphous CoP/Cu<sub>2</sub>O@CF electrocatalyst for efficient hydrogen evolution reaction, *Front. Chem. Sci. Eng.*, 2023, **17**, 1430-1439.
  16. K. Zhang, J. Jia, E. Yang, S. Qi, H. Tian, J. Chen, J. Li, Y. Lou and Y. Guo, Work-function-induced electron rearrangement of in-plane FeP@CoP heterojunction enhances all pH range and alkaline seawater hydrogen evolution reaction, *Nano Energy*, 2023, **114**, 108601.
  17. X. Yu, P. Xu, Q. Chen, N. Cheng, S. Luo, L. Zhang, B. Zhang and Y. Liu, Built-

in Electric Field of CoMoO<sub>4</sub>/CoP Heterostructure for Efficient Alkaline Seawater Hydrogen Evolution, *Energy Fuels*, 2024, **38**, 11172-11179.

18. G. Wu, M. Chen, X. Du and X. Zhang, Controlled synthesis of NiFeCr-S/Ni<sub>3</sub>S<sub>2</sub> as efficient hydrogen evolution catalyst for seawater splitting and urea splitting, *Fuel*, 2024, **368**, 131660.

19. H. Zhao, M. Liu, X. Du and X. Zhang, Synthesis of polymetallic oxide nanoarrays as efficient hydrogen evolution reaction electrocatalyst for alkaline seawater and urea splitting, *Fuel*, 2024, **372**, 132281.

20. H.-Y. Wang, J.-T. Ren, L. Wang, M.-L. Sun, H.-M. Yang, X.-W. Lv and Z.-Y. Yuan, Synergistically enhanced activity and stability of bifunctional nickel phosphide/sulfide heterointerface electrodes for direct alkaline seawater electrolysis, *J. Energy Chem.*, 2022, **75**, 66-73.

21. R. Andaveh, A. Sabour Rouhaghdam, J. Ai, M. Maleki, K. Wang, A. Seif, G. Barati Darband and J. Li, Boosting the electrocatalytic activity of NiSe by introducing MnCo as an efficient heterostructured electrocatalyst for large-current-density alkaline seawater splitting, *Appl. Catal., B*, 2023, **325**, 122355.

22. H. Sun, J. Sun, Y. Song, Y. Zhang, Y. Qiu, M. Sun, X. Tian, C. Li, Z. Lv and L. Zhang, Nickel–Cobalt Hydrogen Phosphate on Nickel Nitride Supported on Nickel Foam for Alkaline Seawater Electrolysis, *ACS Appl. Mater. Interfaces*, 2022, **14**, 22061-22070.

23. L. Guo, J. Chi, T. Cui, J. Zhu, Y. Xia, H. Guo, J. Lai and L. Wang, Phosphorus Defect Mediated Electron Redistribution to Boost Anion Exchange Membrane-Based Alkaline Seawater Electrolysis, *Adv. Energy Mater.*, **n/a**, 2400975.

24. L. Wu, L. Yu, B. McElhenny, X. Xing, D. Luo, F. Zhang, J. Bao, S. Chen and Z. Ren, Rational design of core-shell-structured CoP<sub>x</sub>@FeOOH for efficient seawater electrolysis, *Appl. Catal., B*, 2021, **294**, 120256.

25. Y. He, Y. Hu, Z. Zhu, J. Li, Y. Huang, S. Zhang, M. S. Balogun and Y. Tong, High-performance multidimensional-structured N-doped nickel modulated Mo<sub>2</sub>N/FeO<sub>x</sub>N<sub>y</sub> bifunctional electrocatalysts for efficient alkaline seawater splitting, *Chem. Eng. J.*, 2024, **489**, 151348.

26. Z. Chen, Q. Li, H. Xiang, Y. Wang, P. Yang, C. Dai, H. Zhang, W. Xiao, Z. Wu and L. Wang, Hierarchical porous NiFe-P@NC as an efficient electrocatalyst for alkaline hydrogen production and seawater electrolysis at high current density, *Inorg. Chem. Front.*, 2023, **10**, 1493-1500.
